# Supplementary material
Source: Royal Society of Chemistry journal article supplement (doi:10.1039/d6cc00833j)
Supplement: d6cc00833j1.pdf [file d6cc00833j1.pdf]

## Supporting Information

# Self-Supported Co-Mn Oxide Porous Nanosheets Electrode for Enhanced Oxygen Evolution and Seawater Zinc-Air Batteries

*Zheng Sun<sup>‡a</sup>, Shi-Fang Yang<sup>‡a</sup>, Xu Liu<sup>b</sup>, Ying Wang<sup>a,\*</sup>, Wang-Dong Lu<sup>c,\*</sup>, Peng Yu<sup>a,\*</sup>*

<sup>a</sup> Key Laboratory for Photonic and Electronic Bandgap Materials, Ministry of Education, School of Physics and Electronic Engineering, Harbin Normal University, Harbin, 150025, China.

<sup>b</sup> Department of Chemistry, College of Arts and Science, Northeast Agricultural University, Harbin 150030, China.

<sup>c</sup> Key Laboratory of Modern Measurement & Control Technology, Ministry of Education, Beijing Information Science & Technology University, Beijing 102206, China.

\* Corresponding authors. E-mail addresses: wangying\_10\_16@126.com (Y. Wang); wdlu@bistu.edu.cn (W. Lu); yupeng@hrbnu.edu.cn (P. Yu).

‡ Equally contributed to this work..

## EXPERIMENTAL SECTIONS

### 1 Synthesis of CoMnO/CC Catalysts

The CoMnO/CC catalyst was fabricated via cathodic electrodeposition followed by ligand modification and thermal treatment. Electrodeposition was performed using a standard three-electrode system on a CHI 660E electrochemical workstation. with carbon cloth (1 cm × 2 cm) served as the working electrode, a platinum sheet as the counter electrode, and a saturated calomel electrode (SCE) as the reference electrode. First, manganese-containing species were deposited onto the pretreated CC from a 0.1 M manganese acetate and sodium sulfate mixed solution at a constant potential of 1 V for 270 s. Subsequently, cobalt-containing species were deposited from a 0.1 M  $\text{Co}(\text{NO}_3)_2$  solution at -1 V for 360 s. After electrodeposition, the CC was rinsed thoroughly with deionized water and ethanol each for three times, then dried at 50 °C to obtain the CoMn-Precursor. After electrodeposition, the mass ratio of manganese to cobalt is approximately 1:1.

The as-prepared CoMn-Precursor was immersed in a 1 M 2-methylimidazole methanol solution for 18 h at room temperature. After immersion, the sample was rinsed with deionized water and ethanol each for three times and dried at 50 °C to yield the CoMn-18-precursor. Finally, the CoMn-18-Precursor was annealed in a tube furnace under  $\text{N}_2$  atmosphere with a heating rate of 5 °C /min and maintained at 500 °C at for 2 h, resulting in the CoMnO/CC catalyst.

For comparison, monometallic reference catalysts (CoO/CC and MnO/CC) were synthesized via the same procedure but with electrodeposition of only cobalt nitrate or manganese acetate, respectively, followed by ligand immersion and annealing. Additionally, a series of comparative samples with different ligand immersion times

were prepared, denoted as CoMnO/CC-X (where X represents the immersion time).

## 2 Electrochemical Measurements

Electrochemical measurements were performed on a CHI 660E electrochemical workstation using a standard three-electrode system in 1 M KOH solution at room temperature. The CoMnO/CC catalyst served as the working electrode, while an Ag/AgCl electrode (saturated KCl) and a platinum sheet were used as the reference and counter electrodes, respectively. Linear sweep voltammetry (LSV) was employed to record the OER polarization curves at a scan rate of  $5 \text{ mV}\cdot\text{s}^{-1}$  with IR compensation. All potentials were calibrated to the reversible hydrogen electrode (RHE) using the equation:  $E(\text{RHE}) = E_{(\text{Ag}/\text{AgCl})} + 0.059 \times \text{pH} + 0.197 \text{ V}$ , unless otherwise stated. The electrochemical active surface area (ECSA) was estimated from the electrochemical double-layer capacitance. Electrochemical impedance spectroscopy (EIS) measurements were conducted at 1.55 V vs. RHE over the frequency range of 5 mHz to 100 kHz. The cycle performance of the catalytic electrode was evaluated by chronopotentiometry at  $10 \text{ mA}\cdot\text{cm}^{-2}$  for OER.

## 3 Assembly and Testing of Zinc-Air Batteries

Rechargeable ZABs were assembled at room temperature with the as-prepared catalysts as bifunctional air cathodes, zinc foil as the anode, and a mixed solution of 6.0 M KOH and 0.2 M  $\text{Zn}(\text{Ac})_2$  as the electrolyte. For comparison, commercial Pt/C-RuO<sub>2</sub> composite (mass ratio 1:1) was used as the reference cathode catalyst. The Pt/C-RuO<sub>2</sub> ink was prepared by ultrasonically dispersing 5 mg Pt/C and 5 mg RuO<sub>2</sub> in 300  $\mu\text{L}$  ethanol for 30 min, followed by adding 100  $\mu\text{L}$  of 5% Nafion solution and further ultrasonic treatment for 30 min. The resulting ink was uniformly drop-cast onto a carbon cloth and dried at 60 °C for 1 h. The active material (Co-Mn oxide) loading on the carbon cloth substrate is strictly controlled at  $2 \text{ mg cm}^{-2}$  throughout all

experiments.

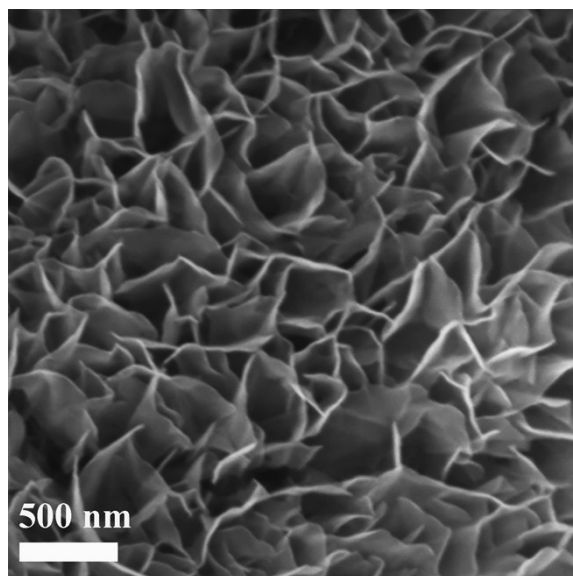

**Fig. S1** SEM image of CoMn-precursor.

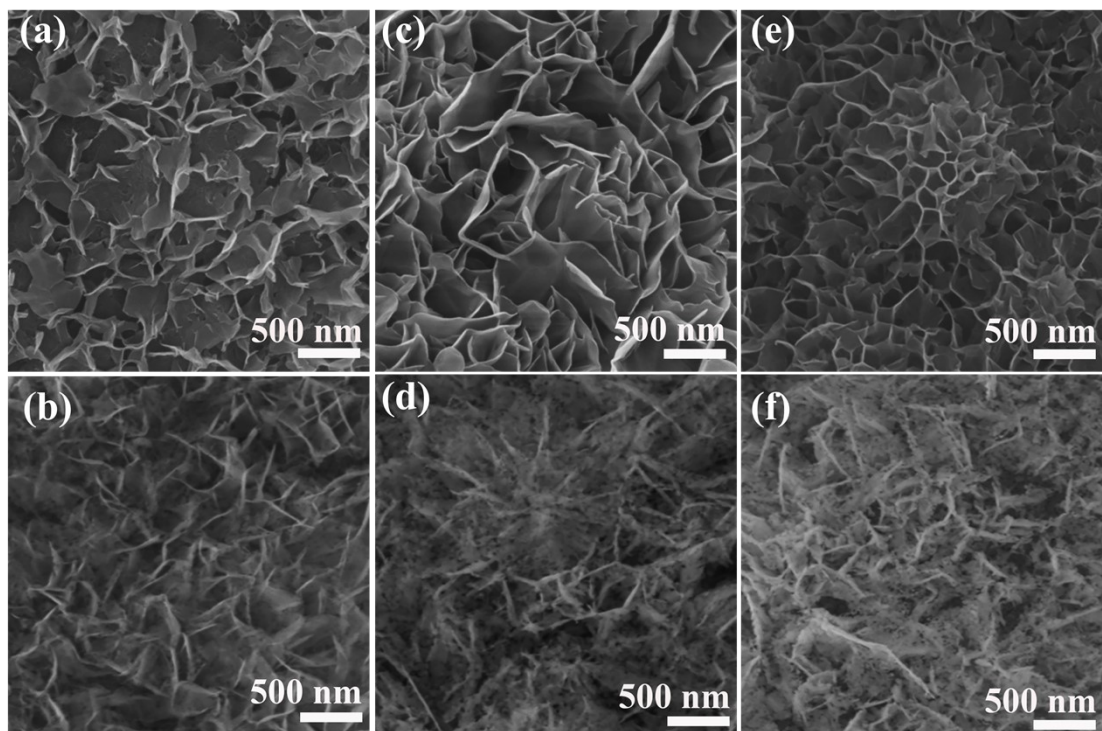

**Fig. S2** SEM images of (a) CoMn/CC-3-Precursor, (b) CoMn/CC-3-Precursor, (c) CoMn/CC-6-Precursor, (d) CoMn/CC-6, (e) CoMn/CC-12-Precursor, (a) CoMn/CC-12.

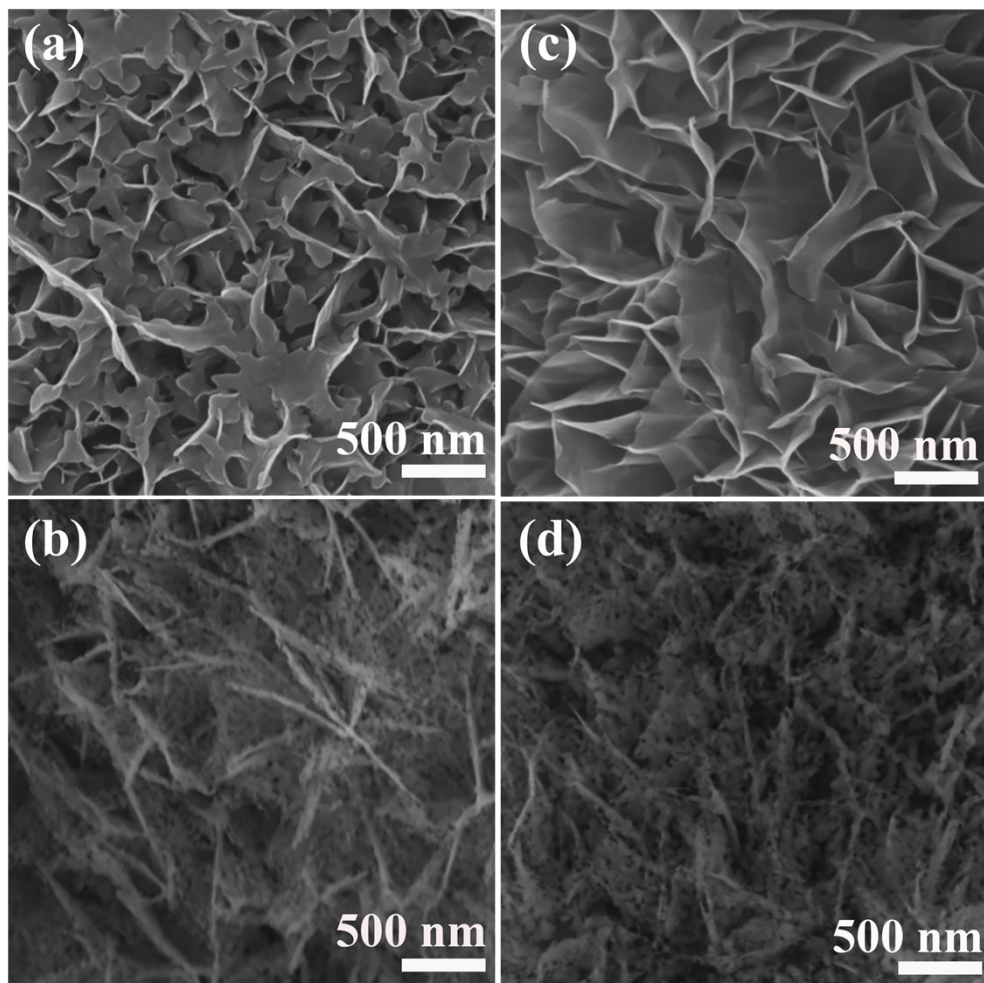

**Fig. S3** SEM images of (a) CoMn/CC-24-precursor, (b) CoMn/CC-24, (c) CoMn/CC-30-precursor, (d) CoMn/CC-30.

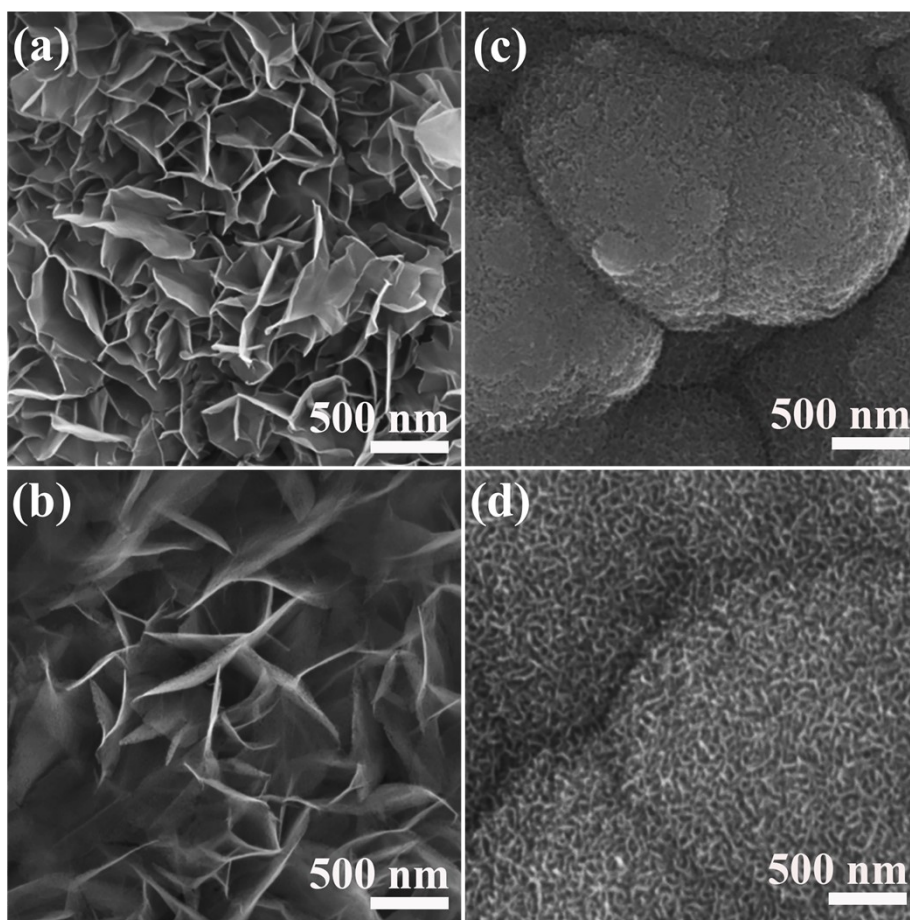

**Fig. S4** SEM images of (a) CoO/CC-18-Precursor; (b) CoO/CC; (c) Mn/CC-18-Precursor; (d) MnO/CC.

| Catalyst | Mn    | Co    | C     | O    |
|----------|-------|-------|-------|------|
| CoMnO/CC | 38.64 | 36.87 | 19.82 | 4.58 |

**Table S1.** Atomic content percentage determined by SEM-EDS

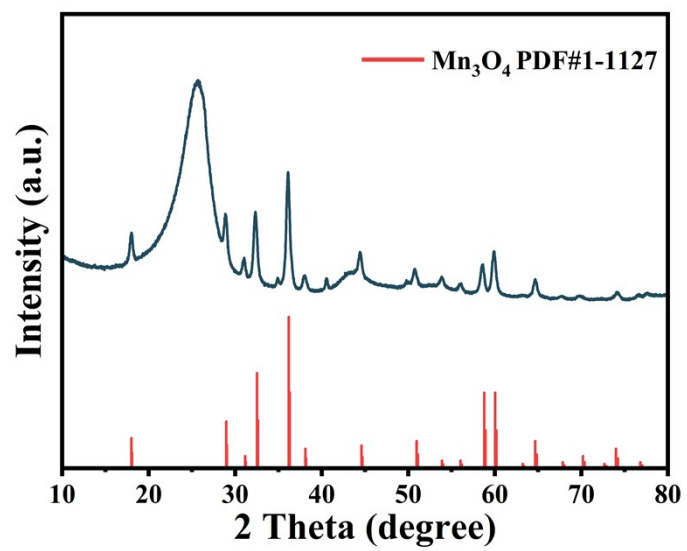

Fig. S5 XRD patterns of MnO/CC.

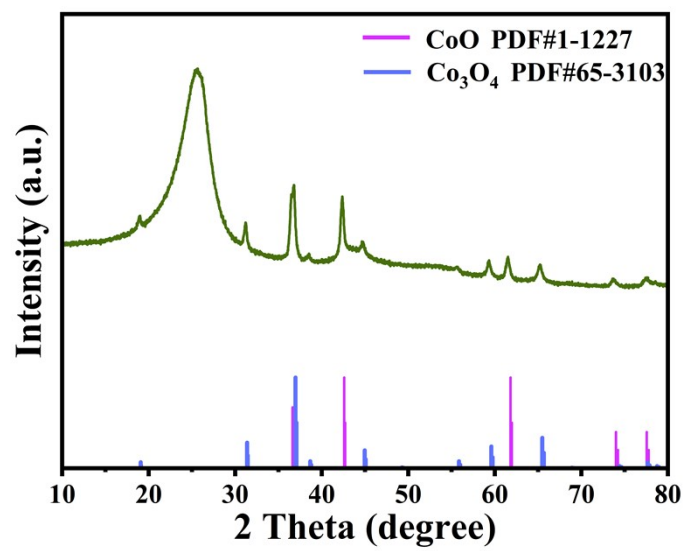

**Fig.S6** XRD patterns of CoO/CC.

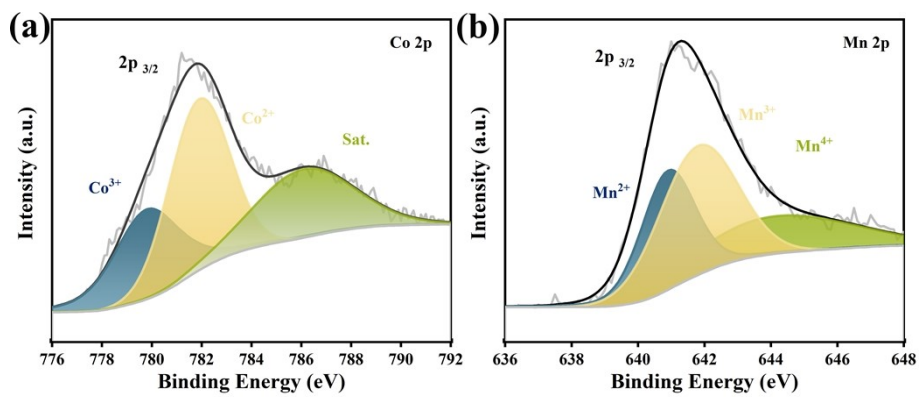

**Fig.S7** XPS spectroscopy of CoO/CC and MnO/CC.

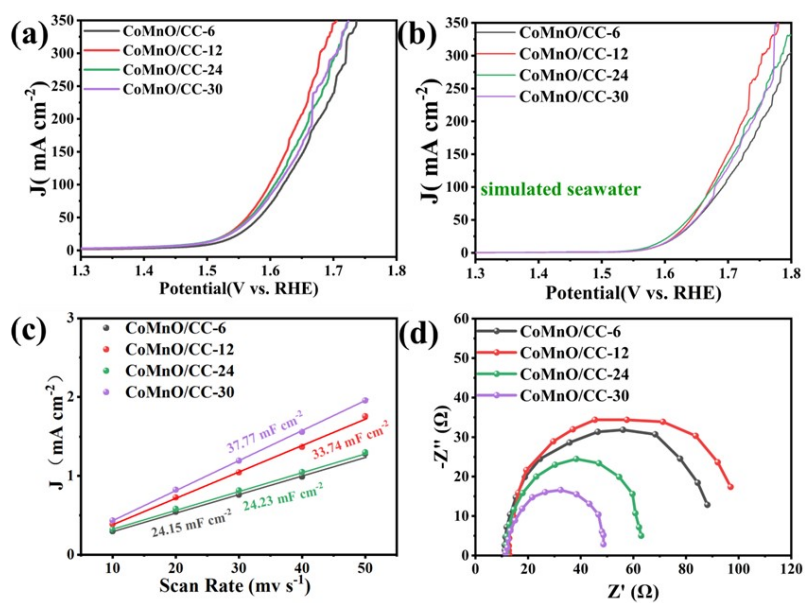

**Fig. S8.** OER LSV curves of samples with different deposition times. (a) 1 M KOH; (b) 1 M KOH simulated seawater; (c) Double-layer capacitance ( $C_{dl}$ ) values of corresponding samples; (d) Electrochemical impedance spectroscopy (EIS) spectra of corresponding samples.

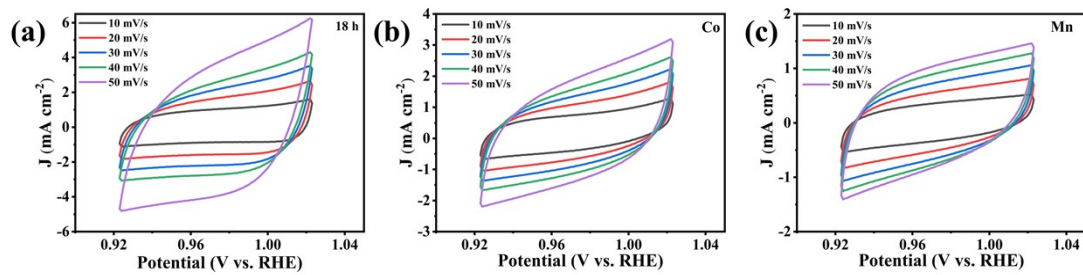

**Fig. S9** CV curves of (a) CoMnO/CC; (b) CoO/CC; and (c) MnO/CC at different scanning rates.

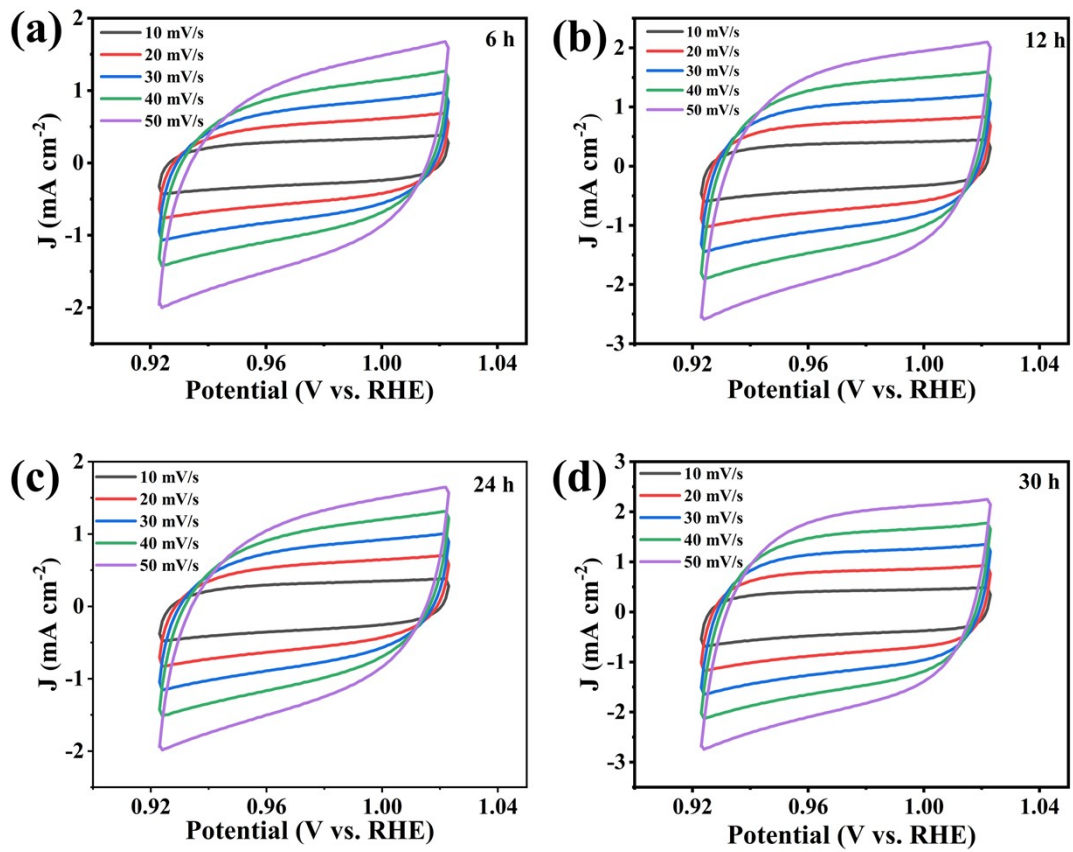

**Fig. S10** CV curves of (a) CoMnO/CC-6; (b) CoMnO/CC-12; (c) CoMnO/CC-24; and (d) CoMnO/CC-30 at different scanning rates.

**Table S2.** Performance comparison of self-supporting electrocatalysts for zinc–air batteries.

| Material                                                | Overpotential<br>(10 mA · cm <sup>-2</sup> ) | Tafel slope<br>(mV · dec <sup>-1</sup> ) | References |
|---------------------------------------------------------|----------------------------------------------|------------------------------------------|------------|
| CoP@CC                                                  | 300                                          | 124                                      | [S1]       |
| NC-Co <sub>3</sub> O <sub>4</sub> /CC                   | 210                                          | 79.6                                     | [S2]       |
| Co/CeO <sub>2</sub> -<br>NCNA@CC                        | 350                                          | 98                                       | [S3]       |
| CoO@PCNAs<br>@CC                                        | 470                                          | 171                                      | [S4]       |
| FeNi@NBCNTs<br>/CC                                      | 290                                          | 85.7                                     | [S5]       |
| W, Cr-<br>Co <sub>3</sub> O <sub>4</sub> /NF            | 347                                          | 136.66                                   | [S6]       |
| CoP/Co <sub>3</sub> O <sub>4</sub> /N-<br>CNFs-370-1:40 | 287                                          | 88.3                                     | [S7]       |
| np-CoCrFeNiNb                                           | 251                                          | 42.7                                     | [S8]       |
| NCA/FeRu                                                | 263                                          | 83.3                                     | [S9]       |
| Co <sub>1</sub> Cu <sub>1</sub> @NCN<br>T/CC            | 263                                          | 53.1                                     | [S10]      |
| CoMnO/CC                                                | 243                                          | 66.45                                    | This work  |

The OER overpotential of CoMnO/CC is lower than that of most catalysts such as CoP@CC (300 mV), Co/CeO<sub>2</sub> (350 mV), and CoO@PCNAs@CC (470 mV), and only slightly higher than that of NC-Co<sub>3</sub>O<sub>4</sub>/CC (210 mV). Meanwhile, the Tafel slope of this catalyst is 66.45 mV·dec<sup>-1</sup>, ranking among the leading levels among all comparative catalysts, which reflects faster OER reaction kinetics. This Tafel slope is only higher than that of np-CoCrFeNiNb (42.7 mV·dec<sup>-1</sup>), but significantly lower than that of similar materials like CoP@CC (124 mV·dec<sup>-1</sup>) and CoO@PCNAs@CC (171 mV·dec<sup>-1</sup>).

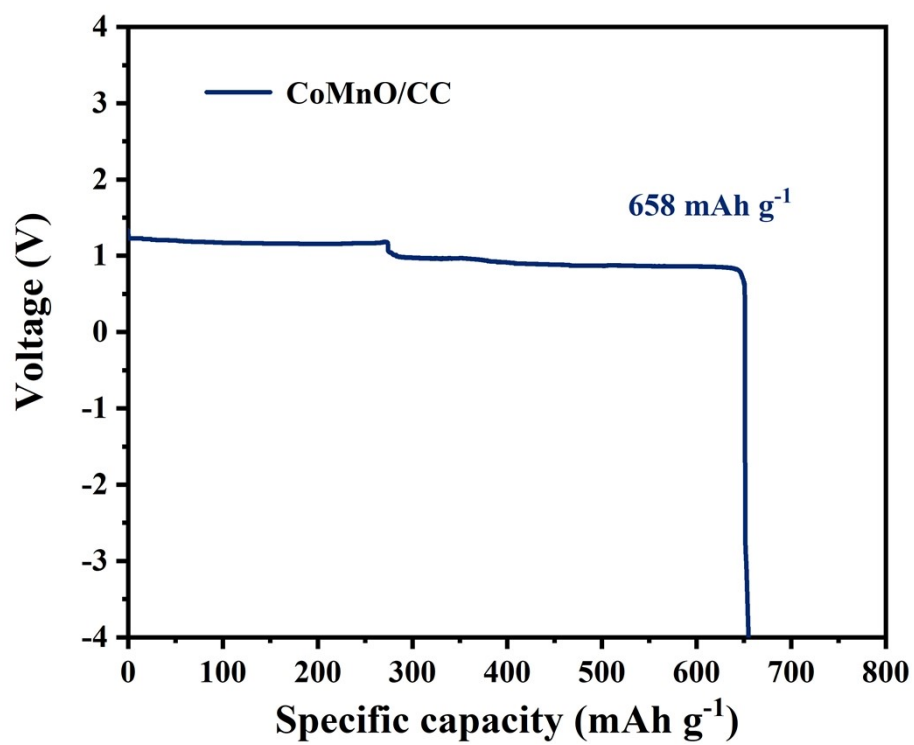

**Fig. S11** Specific discharge capacity plots of CoMnO/CC assembled ZABs at a current density of 10 mA cm<sup>-2</sup>.

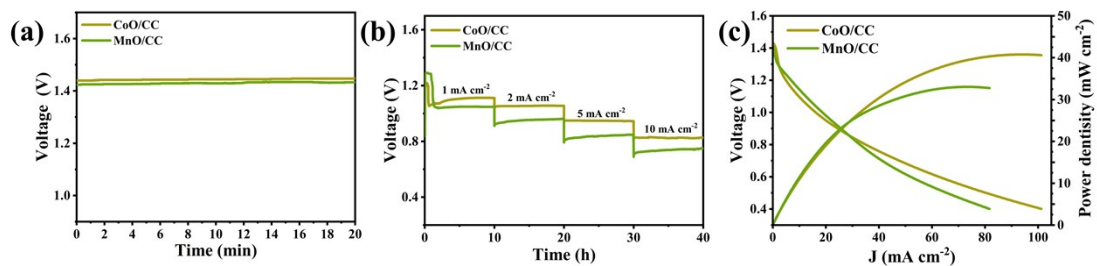

**Fig. S12** Zinc-air batteries assembled with CoO/CC and MnO/CC electrodes: (a) open-circuit voltage; (b) discharge voltage step (at current densities of 1~10 mA cm<sup>-2</sup>); (c) discharge polarization curves and power density curves.

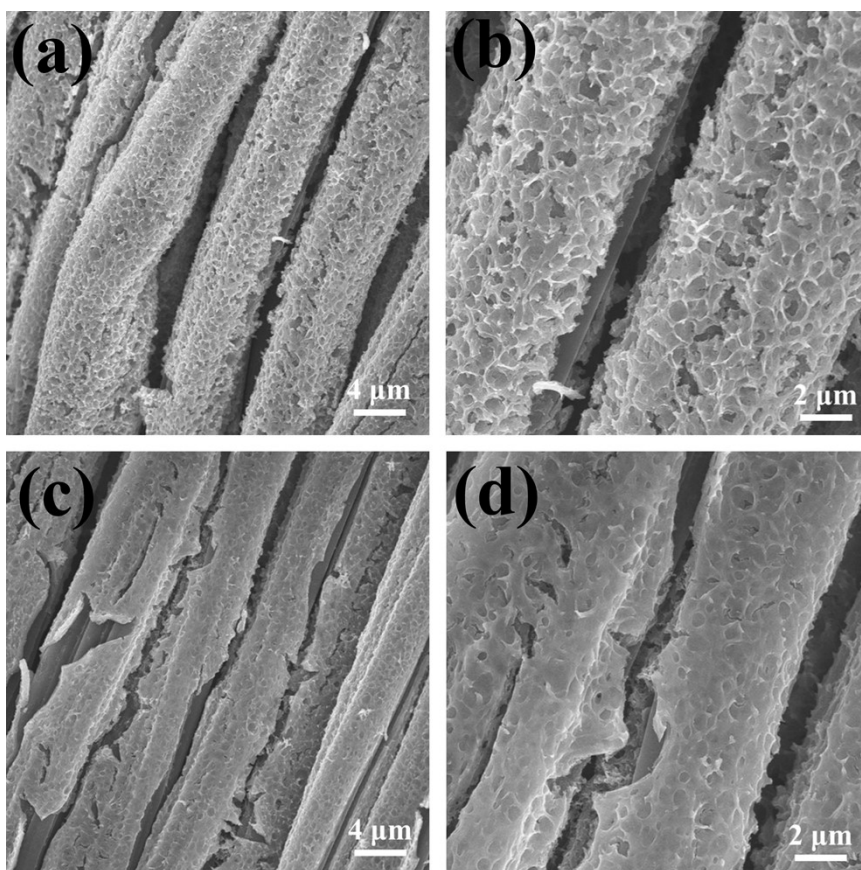

**Fig. S13** (a, b) SEM image of CoMnO/CC; (c, d) SEM image of CoMnO/CC after 300 h stability test.

## Reference

- (S1) Cheng, Y.F.; Liao, F.; Shen, W.; Liu, L.B.; Jiang, B.B.; Li, Y.Q.; Shao, M.W. Carbon cloth supported cobalt phosphide as multifunctional catalysts for efficient overall water splitting and zinc – air batteries. *Nanoscale* 2017, 9, 18977 – 18982.
- (S2) Liu, Q.; Wang, L.; Liu, X.; Yu, P.; Tian, C.; Fu, H. N-doped carbon-coated  $\text{Co}_3\text{O}_4$  nanosheet array/carbon cloth for stable rechargeable Zn-air batteries. *Sci. China Mater.* 2019, 62, 624–632.
- (S3) Li, S.X.; Zhang, H.; Wu, L.; Zhao, H.W.; Li, L.X.; Sun, C.G.; An, B.G. Vacancy-engineered  $\text{CeO}_2/\text{Co}$  heterostructure anchored on the nitrogen-doped porous carbon nanosheet arrays vertically grown on carbon cloth as an integrated cathode for the oxygen reduction reaction of rechargeable Zn–air battery. *J. Mater. Chem. A* 2022, 10, 9858 – 9868.
- (S4) Chen, L.L.; Song, Z.H.; Li, Z.; Yang, Z.; Zhang, J.M.; Li, H.; Zheng, Z.M. Integrated CoO nanoparticles @ porous carbon nanosheets arrays on carbon cloth as cathode for rechargeable Zn-air batteries. *J. Alloys Compd.* 2022, 894, 162456.
- (S5) Yu, N.F.; Shu, X.Y.; Yang, Y.J.; Wang, H.H.; Huang, Q.H.; Tian, N.; Ye, J.L.; Wu, Y.P. In situ growth of N-doped bamboo-like carbon nanotubes embedded with FeNi nanoparticles on carbon cloth as self-standing cathodes for efficient rechargeable zinc – air batteries. *Catal. Sci. Technol.* 2025, 15, 1604–1616.
- (S6) Chen, L.; Yao, R.; Zhang, Y.; Li, W.; Li, J.; Liu, G. Dual doping of W and Cr on  $\text{Co}_3\text{O}_4$  accelerates reconstruction for improved oxygen evolution in neutral media. *J. Alloys Compd.* 2025, 184168.
- (S7) Guan, Z.; Bo, L.; Zhu, J.; Feng, Z.; Wang, Q.; Li, Y.; Gou, J.M.; Yang, X.L.; Nian, F.; Tong, J. Defect engineering and electronic modulation of heterostructured  $\text{CoP}/\text{Co}_3\text{O}_4/\text{N}$ -doped carbon nanofibers as efficient bifunctional electrocatalysts for water splitting. *J. Colloid Interface Sci.* 2025, 138979.
- (S8) Lin, Y.; Xu, W.; Gao, Z.; Liang, Y.; Jiang, H.; Li, Z.; Wu, S.L.; Cui, Z.D.; Sun, H.J.; Zhang, H.F.; Zhu, S. Self-supporting high-entropy Co-Cr-Fe-Ni-Nb oxide

electrocatalyst with nanoporous structure for oxygen evolution reaction. *Chem. Eng. J.* 2024, 489, 151233.

(S9) Zhang, X.; Liu, Y.; Dai, H.; Xu, D.; Chen, Y.; Pan, D.; He, T.; Zhang, Y.; Chen, S.W.; Ouyang, X. Efficient trifunctional electrocatalysts with iron single atoms electronically coupled with adjacent ruthenium nanoclusters for zinc-air battery-powered water splitting. *Appl. Catal. B Environ.* 2025, 368, 125127.

(S10) Chu, X.; Wang, Y.; Sun, J.; Wu, Y.; Jiang, W.; Liu, B.; Liu, C.B.; Che, G.B.; Sun, Y.T.; Yang, X. Nitrogen-doped carbon nanotube encapsulated CoCu bimetallic alloy particles to promote efficient oxygen evolution reaction via electronic structure regulation. *J. Colloid Interface Sci.* 2025, 137775.
